# Supplementary material for: Evaluating Face2Gene as a Tool to Identify Cornelia de Lange Syndrome by Facial Phenotypes
Source: PubMed Central journal article supplement (PMC7038094; doi:10.3390/ijms21031042), 2020-02-04
Supplement: ijms-21-01042-s001.pdf [file ijms-21-01042-s001.pdf]

Abbreviations: BRWS, Baraitser-Winter Syndrome; CdLS, Cornelia De Lange Syndrome; CSS, Coffin-Siris Syndrome; EDSMC1, Ehlers-danlos syndrome musculocontractural type 1; FAS, Fetal Alcohol Syndrome; HFM, Hemifacial Microsomia; KBG, KBG Syndrome; MBS, Moebius Syndrome; ML4, Mucopolipidosis Type IV; RTT, Rett Syndrome; RSTS, Rubinstein-Taybi Syndrome; SBBYSS, Ohdo Syndrome, SBBYS Variant.

**Supplementary Table2: Face2Gene facial analysis of 16 patients with CdLS at different ages.** For each case the most frequent syndromes are listed. The value in the cells is the position in the sorted suggestion list. Shades of black indicate high gestalt level, shades of gray indicate mild gestalt level and shades of pale gray indicate low gestalt level.

| ID   | Age | CdLS | FAS | SLOS | MBS | KBGS | BRWS | CSS | Cri-Du-Chat | FVS | RSTS |
|------|-----|------|-----|------|-----|------|------|-----|-------------|-----|------|
| #N01 | 5   | 1    |     | 4    |     |      | 2    | 3   |             | 5   |      |
|      | 11  | 1    | 3   | 2    | 5   | 4    |      |     |             |     |      |
|      | 13  | 1    | 3   |      | 2   |      |      |     | 4           |     | 5    |

| ID   | Age | CdLS | KBGS | HFA | Turner | RSTS | Stickler | Sotos | MBS | SLOS |
|------|-----|------|------|-----|--------|------|----------|-------|-----|------|
| #N05 | 6   | 1    | 2    |     |        |      | 3        |       | 4   | 5    |
|      | 14  | 1    | 2    | 4   | 5      | 3    |          |       |     |      |
|      | 15  | 1    | 2    | 5   | 4      |      |          | 3     |     |      |

| ID   | Age | CHARGE | pWS | USP7-Related Disorder | CdLS | HFM | RSTS | AS | CSS | RTT | KLEFS | 22q11.2 Deletion |
|------|-----|--------|-----|-----------------------|------|-----|------|----|-----|-----|-------|------------------|
| #H46 | 9   | 1      | 3   | 2                     |      |     |      | 4  |     |     | 5     |                  |
|      | 11  | 1      | 2   |                       | 3    |     | 4    |    |     |     |       | 5                |
|      | 14  | 1      | 2   |                       |      | 3   |      |    | 4   | 5   |       |                  |

| ID   | Age | CdLS | KBGS | GLHS | MNKES | LMNS | MBS | ML4 | FAS | BWS | CLS |
|------|-----|------|------|------|-------|------|-----|-----|-----|-----|-----|
| #N08 | 1   | 1    |      | 3    |       | 2    |     | 4   |     | 5   |     |
|      | 6   | 1    | 2    | 3    | 5     |      |     |     | 4   |     |     |
|      | 9   | 1    | 2    |      | 4     |      | 3   |     |     |     | 5   |

| ID   | Age | CdLS | MBS | CHARGE | MRX102 | ML4 | KBGS | FAS | GLHS | AS |
|------|-----|------|-----|--------|--------|-----|------|-----|------|----|
| #N28 | 9   | 1    | 2   | 3      | 5      |     |      | 4   |      |    |
|      | 12  | 1    | 2   |        | 5      |     | 3    |     | 4    |    |
|      | 13  | 1    | 2   | 4      |        | 3   |      |     |      | 5  |

| ID   | Age | KBGS | CdLS | Glass | AAS | PHMDS | FAS | MRX102 | CLS | SMS | DM |
|------|-----|------|------|-------|-----|-------|-----|--------|-----|-----|----|
| #S36 | 1   | 1    | 2    |       | 3   |       |     | 4      |     | 5   |    |
|      | 3   | 1    | 2    | 3     |     |       |     |        | 4   |     | 5  |
|      | 4   | 1    | 2    | 5     |     | 3     | 4   |        |     |     |    |

| ID   | Age | CdLS | KBGS | CHARGE | CSS | HFM | MRX102 | MFS | RSTS | FVS | HFA |
|------|-----|------|------|--------|-----|-----|--------|-----|------|-----|-----|
| #N09 | 21  | 1    | 2    | 3      | 4   | 5   |        |     |      |     |     |
|      | 24  | 1    | 2    | 3      | 5   |     | 4      |     |      |     |     |
|      | 26  | 1    | 2    |        |     | 3   |        |     | 4    |     | 5   |
|      | 33  | 1    |      |        | 2   |     | 5      | 3   |      | 4   |     |

| ID   | Age | CdLS | ML4 | RTT | Sotos | MNKES | MRXSL | pWS | KBGS | HFA | BCNS | MRX102 | BBS | JBTS |
|------|-----|------|-----|-----|-------|-------|-------|-----|------|-----|------|--------|-----|------|
| #N13 | 4   | 1    | 5   |     |       | 2     |       | 3   |      | 4   |      |        |     |      |
|      | 10  | 1    | 2   |     |       |       | 3     |     | 4    |     |      |        |     | 5    |
|      | 17  | 1    |     | 2   | 3     |       |       |     |      |     | 4    |        | 5   |      |
|      |     | 1    |     |     |       |       |       |     |      |     |      |        |     |      |
|      | 27  | 1    | 2   | 3   | 4     |       |       |     |      |     |      | 5      |     |      |

| ID   | Age | CdLS | SGBSI | KBGS | MBS | RSTS | CHARGE | BWS | CSS | HFM | Campomelic<br>Dysplasia | PKS |
|------|-----|------|-------|------|-----|------|--------|-----|-----|-----|-------------------------|-----|
| #N21 | 2   | 1    | 4     |      | 3   | 2    |        |     |     | 5   |                         |     |
|      | 3   | 1    | 2     | 4    |     |      |        | 3   |     |     | 5                       |     |
|      | 5   | 1    | 3     | 2    |     |      |        |     | 4   |     |                         | 5   |
|      | 7   | 1    | 2     | 4    | 3   |      | 5      |     |     |     |                         |     |

| ID   | Age | CdLS | RTT | RSTS | Sotos | MCAP<br>PYCR2<br>Mutations | MBS | ML4 | SMS | MNKES | HPMRS | WDSTS |
|------|-----|------|-----|------|-------|----------------------------|-----|-----|-----|-------|-------|-------|
| #S37 | 2   | 1    | 3   |      |       | 2                          |     |     | 4   |       | 5     |       |
|      | 3   | 1    | 4   | 5    | 3     | 2                          |     |     |     |       |       |       |
|      | 4   | 1    | 2   |      |       |                            | 3   | 4   |     |       |       | 5     |
|      | 7   | 1    | 4   | 2    | 3     |                            |     |     |     | 5     |       |       |

| ID   | Age | CdLS | KBGS | CHARGE | MBS | EDSMC1 | RSTS | Waardenbur | BRWS | BOPS | MCAP | HPMRS |
|------|-----|------|------|--------|-----|--------|------|------------|------|------|------|-------|
| #N16 | 1   | 1    |      | 4      |     | 5      |      | 2          |      |      | 3    |       |
|      | 2   | 1    | 2    | 4      | 3   | 5      |      |            |      |      |      |       |
|      | 3   | 1    | 2    |        | 4   |        |      |            | 3    |      |      | 5     |
|      | 5   | 1    | 5    | 4      |     |        | 2    |            |      | 3    |      |       |

| ID   | Age | CdLS | KBGS | RSTS | CHARGE | ML4 | HFM | LIS1 | MBS | CSS | MPS |
|------|-----|------|------|------|--------|-----|-----|------|-----|-----|-----|
| #N26 | 1   | 1    | 5    | 4    | 3      |     |     | 2    |     |     |     |
|      | 2   | 1    | 2    | 4    | 3      |     |     |      |     |     | 5   |
|      | 3   | 1    |      | 3    |        | 2   | 5   |      |     | 4   |     |
|      | 7   | 1    | 5    |      |        | 3   | 4   |      | 2   |     |     |

| ID   | Age | CdLS | MBS | KBGS | CHARGE | HFM | ML4 | MDLS | WDSTS |
|------|-----|------|-----|------|--------|-----|-----|------|-------|
| #N20 | 2   | 1    | 3   | 2    |        | 4   |     |      | 5     |
|      | 5   | 1    | 2   |      | 3      |     | 4   | 5    |       |
|      | 6   | 1    | 2   | 3    | 4      | 5   |     |      |       |

| ID   | Age | CdLS | MBS | CHARGE | UFS | KBGS | BBS | EDSMC1 | PWS |
|------|-----|------|-----|--------|-----|------|-----|--------|-----|
| #N07 | 4   | 1    | 3   | 2      |     |      | 4   |        | 5   |
|      | 13  | 1    | 5   |        | 2   | 3    |     | 4      |     |

| ID   | Age | CdLS | RSTS | Cri-Du-<br>Chat | Noonan | CHARGE | CFSMR | LDS | BRWS |
|------|-----|------|------|-----------------|--------|--------|-------|-----|------|
| #N12 | 5   | 1    | 2    |                 | 3      | 4      |       | 5   |      |
|      | 16  | 1    | 2    | 3               |        |        | 4     |     | 5    |

Abbreviations: AS, Angelman syndrome; ASS, Aarskog-Scott syndrome; BBS, Bardet-Biedl Syndrome; BCNS, Basal cell nevus syndrome; BOPS, Bohring-Opitz syndrome; BRWS, Baraitser-Winter Syndrome; CdLS, Cornelia De Lange Syndrome; CFSMR, Craniofacial dysmorphism, skeletal anomalies, and mental retardation syndrome; CSS, Coffin-Siris Syndrome; DM, Myotonic Dystrophy; EDSMC1, Ehlers-danlos syndrome musculocontractural type 1; FAS, Fetal Alcohol Syndrome; FVS, Fetal Valproate Syndrome; GLHS, Gomez-Lopez-Hernandez syndrome HFA, Hemifacial atrophy, progressive; HFM, Hemifacial Microsomia; HPMRS, Hyperphosphatasia with mental retardation syndrome 1; JBTS, Joubert Syndrome; KBG, KBG Syndrome; KLEFS, Kleefstra Syndrome; LDS, Loey-Dietz Syndrome; MBS, Moebius Syndrome; MCAP, Megalencephaly-capillary malformation-polymicrogyria syndrome; MFS, Marfan Syndrome; ML4, Mucopolipidosis Type IV; MPS, Mucopolysaccharidoses; MNKES, Muenke syndrome; MRXSL, Mental retardation, X-linked syndromic, Lubs type; MRX102, Mental retardation, X-linked 102; PHMDS, Phelan-McDermid syndrome; PKS, Pallister-Killian syndrome; PWS, Prader-Willi Syndrome; RSTS, Rubinstein-Taybi Syndrome; RTT: Rett Syndrome; SBBYSS, Ohdo Syndrome, SBBYS Variant; SLOS, Smith-Lemli-Opitz syndrome; SMS, Smith-Magenis syndrome; UFS, Urofacial Syndrome; WDSTS, Wiedemann-Steiner syndrome.
